# Supplementary material
Source: MDPI journal article supplement (https://www.mdpi.com/2311-7524/9/10/1112)
Supplement: s1 [file s1]

Supplementary Table S1. Dataset used for analysis of variance and machine learning research.

| Medium | Dose (mg L <sup>-1</sup> ) | Replication | TNR   | LRL    | ARL   | NMR  | NS   | SL    | SD   | LW    | LL    |
|--------|----------------------------|-------------|-------|--------|-------|------|------|-------|------|-------|-------|
| MS     | 0IBA                       | 1           | 4.2   | 46.4   | 46    | 1    | 1.2  | 29.4  | 2    | 4.8   | 9.6   |
| MS     | 0IBA                       | 2           | 6.6   | 56.2   | 54.62 | 1    | 1.4  | 32.2  | 2    | 5     | 10.2  |
| MS     | 0IBA                       | 3           | 8.2   | 58.6   | 58.73 | 1.4  | 1.6  | 52.94 | 2    | 7.8   | 15    |
| MS     | 0.5IBA                     | 1           | 19.2  | 70.26  | 45.4  | 1.5  | 3.8  | 40.56 | 2    | 7.4   | 11.6  |
| MS     | 0.5IBA                     | 2           | 20.4  | 80.27  | 50.2  | 2    | 4    | 58    | 2.4  | 8     | 12.8  |
| MS     | 0.5IBA                     | 3           | 26    | 90.28  | 60    | 2.2  | 4.8  | 58.6  | 2.5  | 8.5   | 14    |
| MS     | 1IBA                       | 1           | 22.66 | 38.4   | 35.8  | 1.6  | 4    | 44.2  | 1.8  | 6.6   | 10.8  |
| MS     | 1IBA                       | 2           | 26.2  | 59.2   | 45.2  | 2.2  | 4.6  | 49.6  | 2    | 9     | 13.4  |
| MS     | 1IBA                       | 3           | 30.4  | 61.2   | 52    | 2.6  | 5.2  | 53.6  | 2.2  | 9     | 15.2  |
| MS     | 1.5IBA                     | 1           | 11.2  | 36.5   | 31.2  | 1.6  | 2.6  | 35.6  | 2    | 5     | 9.2   |
| MS     | 1.5IBA                     | 2           | 19.4  | 39.8   | 37.2  | 2    | 2.6  | 45    | 2    | 7     | 10.6  |
| MS     | 1.5IBA                     | 3           | 24    | 65.75  | 52.2  | 2    | 3.6  | 60.4  | 2    | 7.6   | 12    |
| MS     | 2IBA                       | 1           | 24.8  | 63     | 49    | 1.8  | 4    | 44.4  | 2    | 4.4   | 10.4  |
| MS     | 2IBA                       | 2           | 30.8  | 53.2   | 41.2  | 2.2  | 5.2  | 63.4  | 2.4  | 6     | 10.6  |
| MS     | 2IBA                       | 3           | 30    | 79.8   | 50    | 2.4  | 5    | 72.2  | 2.6  | 8.8   | 17.8  |
| WPM    | 0IBA                       | 1           | 10.6  | 30.8   | 26.2  | 1    | 1.2  | 33.6  | 1.8  | 4.8   | 10    |
| WPM    | 0IBA                       | 2           | 12.8  | 41.2   | 37.6  | 1    | 1.6  | 34.4  | 2    | 4.8   | 10.4  |
| WPM    | 0IBA                       | 3           | 14    | 49.6   | 40.54 | 1.2  | 1.8  | 38    | 2    | 5.2   | 12.4  |
| WPM    | 0.5IBA                     | 1           | 23.42 | 90.92  | 53.87 | 1.83 | 4.64 | 49.48 | 2.44 | 9.03  | 14.15 |
| WPM    | 0.5IBA                     | 2           | 24.89 | 97.93  | 61.24 | 2.44 | 4.88 | 70.76 | 2.93 | 9.76  | 15.62 |
| WPM    | 0.5IBA                     | 3           | 31.72 | 104.92 | 74.72 | 2.68 | 5.86 | 71.49 | 3.05 | 10.37 | 17.08 |
| WPM    | 1IBA                       | 1           | 25.11 | 46.85  | 43.68 | 1.95 | 4.88 | 53.92 | 2.2  | 8.05  | 13.18 |
| WPM    | 1IBA                       | 2           | 31.96 | 72.22  | 55.14 | 2.68 | 5.61 | 60.51 | 2.44 | 10.98 | 16.35 |
| WPM    | 1IBA                       | 3           | 39.63 | 74.66  | 63.44 | 3.17 | 6.34 | 65.39 | 2.68 | 10.98 | 18.54 |
| WPM    | 1.5IBA                     | 1           | 13.66 | 44.53  | 38.06 | 1.95 | 3.17 | 43.43 | 2.44 | 6.1   | 11.22 |
| WPM    | 1.5IBA                     | 2           | 23.67 | 48.56  | 45.38 | 2.44 | 3.17 | 54.9  | 2.44 | 8.54  | 12.93 |
| WPM    | 1.5IBA                     | 3           | 29.28 | 80.22  | 63.68 | 2.44 | 4.39 | 73.69 | 2.44 | 9.27  | 14.64 |
| WPM    | 2IBA                       | 1           | 26.5  | 83.66  | 51.48 | 2.2  | 4.66 | 54.17 | 2.44 | 5.37  | 14.69 |
| WPM    | 2IBA                       | 2           | 37.58 | 64.9   | 50.26 | 2.68 | 6.34 | 77.35 | 2.93 | 7.32  | 12.93 |
| WPM    | 2IBA                       | 3           | 40.36 | 90.56  | 69.3  | 2.93 | 6.32 | 88.08 | 3.17 | 10.74 | 19.72 |

Total number of roots (TNR), longest root length (LRL) (mm), average root length (ARL) (mm), number of main roots (NMR), number of siblings (NS), shoot length (SL) (mm), shoot diameter (SD) (mm), leaf width (LW) (mm), leaf length (LL) (mm), MS (Murashige and Skoog), WPM (woody plant medium), and IBA (indole-3-butyric acid).
